# Supplementary material for: Evaluation of NO + reagent ion chemistry for on-line measurements of atmospheric volatile organic compounds
Source: Copernicus journal article supplement (doi:10.5194/amt-2016-78), 2016-04-07
Supplement: Supplementary file 1 [file amt-2016-78-supplement.pdf]

**Supplementary information for Evaluation of NO<sup>+</sup> reagent ion chemistry for on-line measurements of atmospheric volatile organic compounds**

Abigail R. Koss<sup>1,2,3</sup>, Carsten Warneke<sup>1,2</sup>, Bin Yuan<sup>1,2</sup>, Matthew M. Coggon<sup>1,2</sup>, Patrick R. Veres<sup>1,2</sup>, Joost A. de Gouw<sup>1,2,3</sup>

*1. NOAA Earth System Research Laboratory (ESRL), Chemical Sciences Division, Boulder, CO, USA*

*2. Cooperative Institute for Research in Environmental Sciences, University of Colorado at Boulder, Boulder, CO, USA*

*3. Department of Chemistry and Biochemistry, University of Colorado at Boulder, CO, USA*

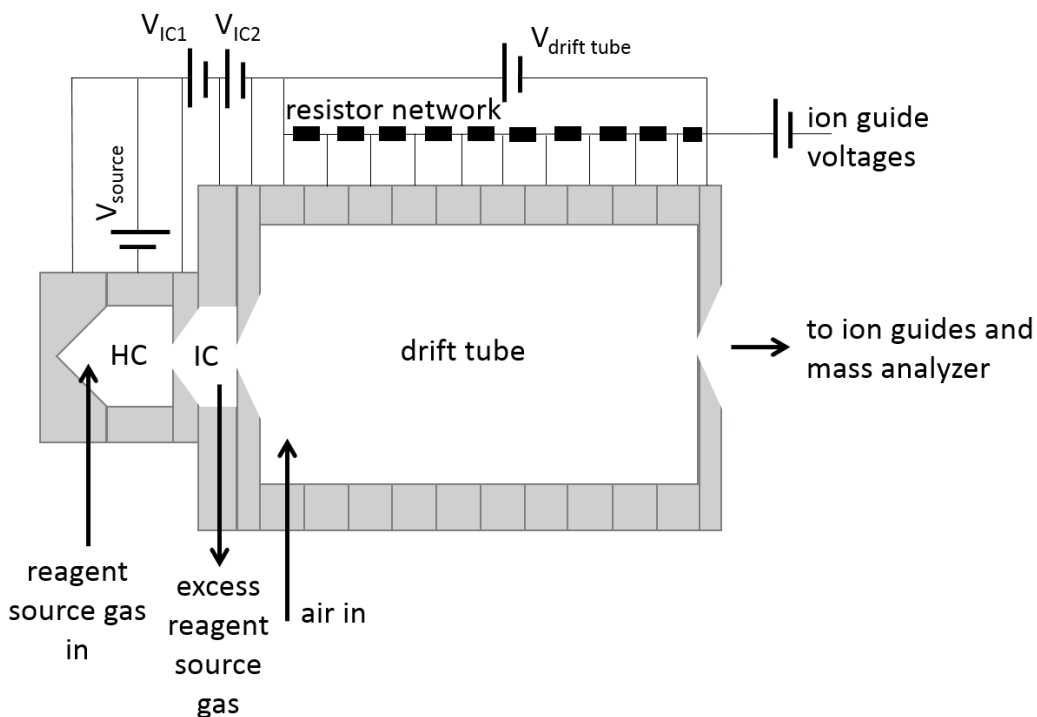

Figure S1. Ion source and drift tube schematic.

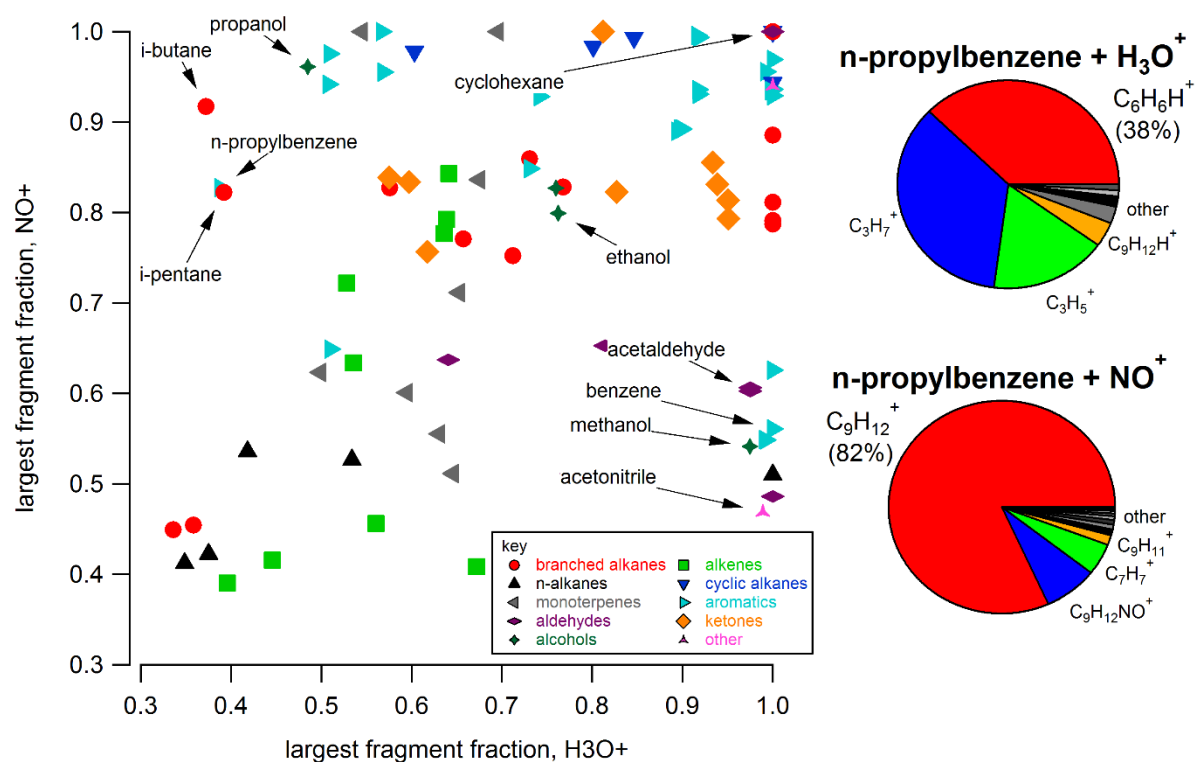

Figure S2. Comparison of product ion distributions between  $NO^+$  CIMS and  $H_3O^+$  CIMS. The complete product ion distribution of n-propylbenzene is shown as an example of a compound with a complex mass spectrum resulting from  $H_3O^+$  chemistry, and a simple mass spectrum resulting from  $NO^+$  chemistry.

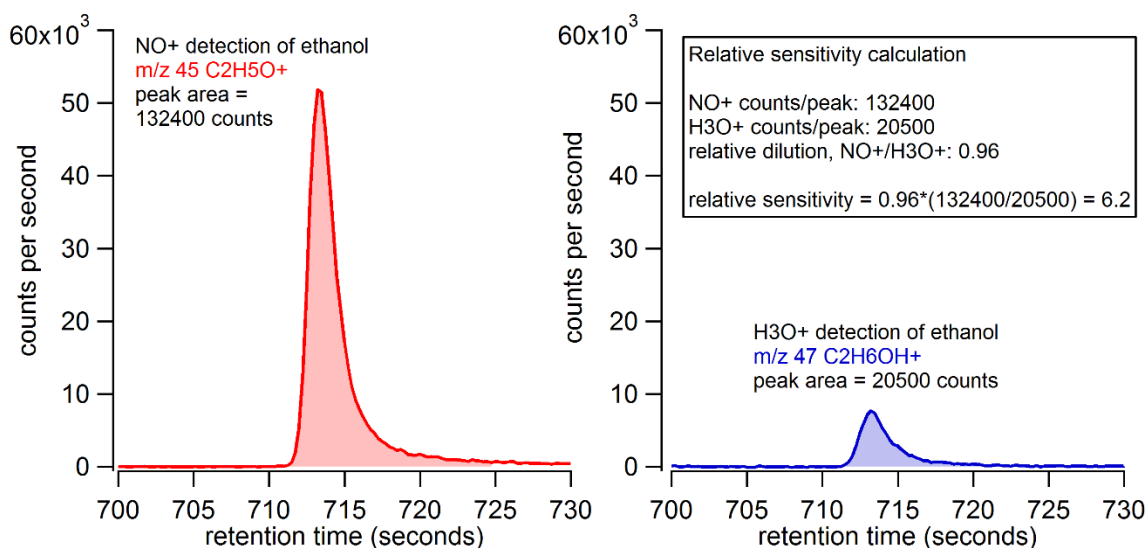

Figure S3. Example chromatograms and relative sensitivity calculation of ethanol for Table 2.

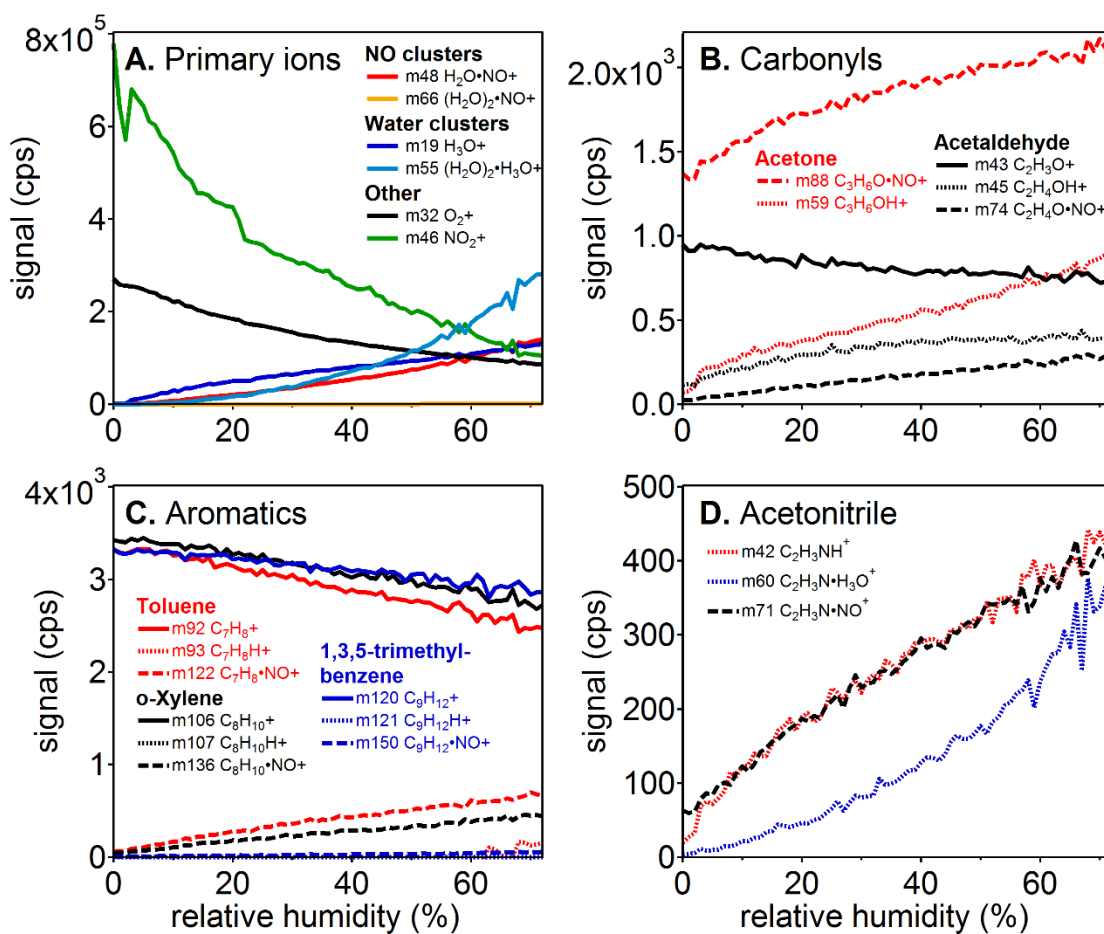

Figure S4. Humidity dependence of primary ions and VOCs. (a) Impurity ions and water clusters. (b) Carbonyls. (c) Aromatics. (d) Acetonitrile. Acetonitrile is detected with poor sensitivity using NO<sup>+</sup>; the NO<sup>+</sup> and H<sub>3</sub>O<sup>+</sup> products are approximately equal in magnitude.

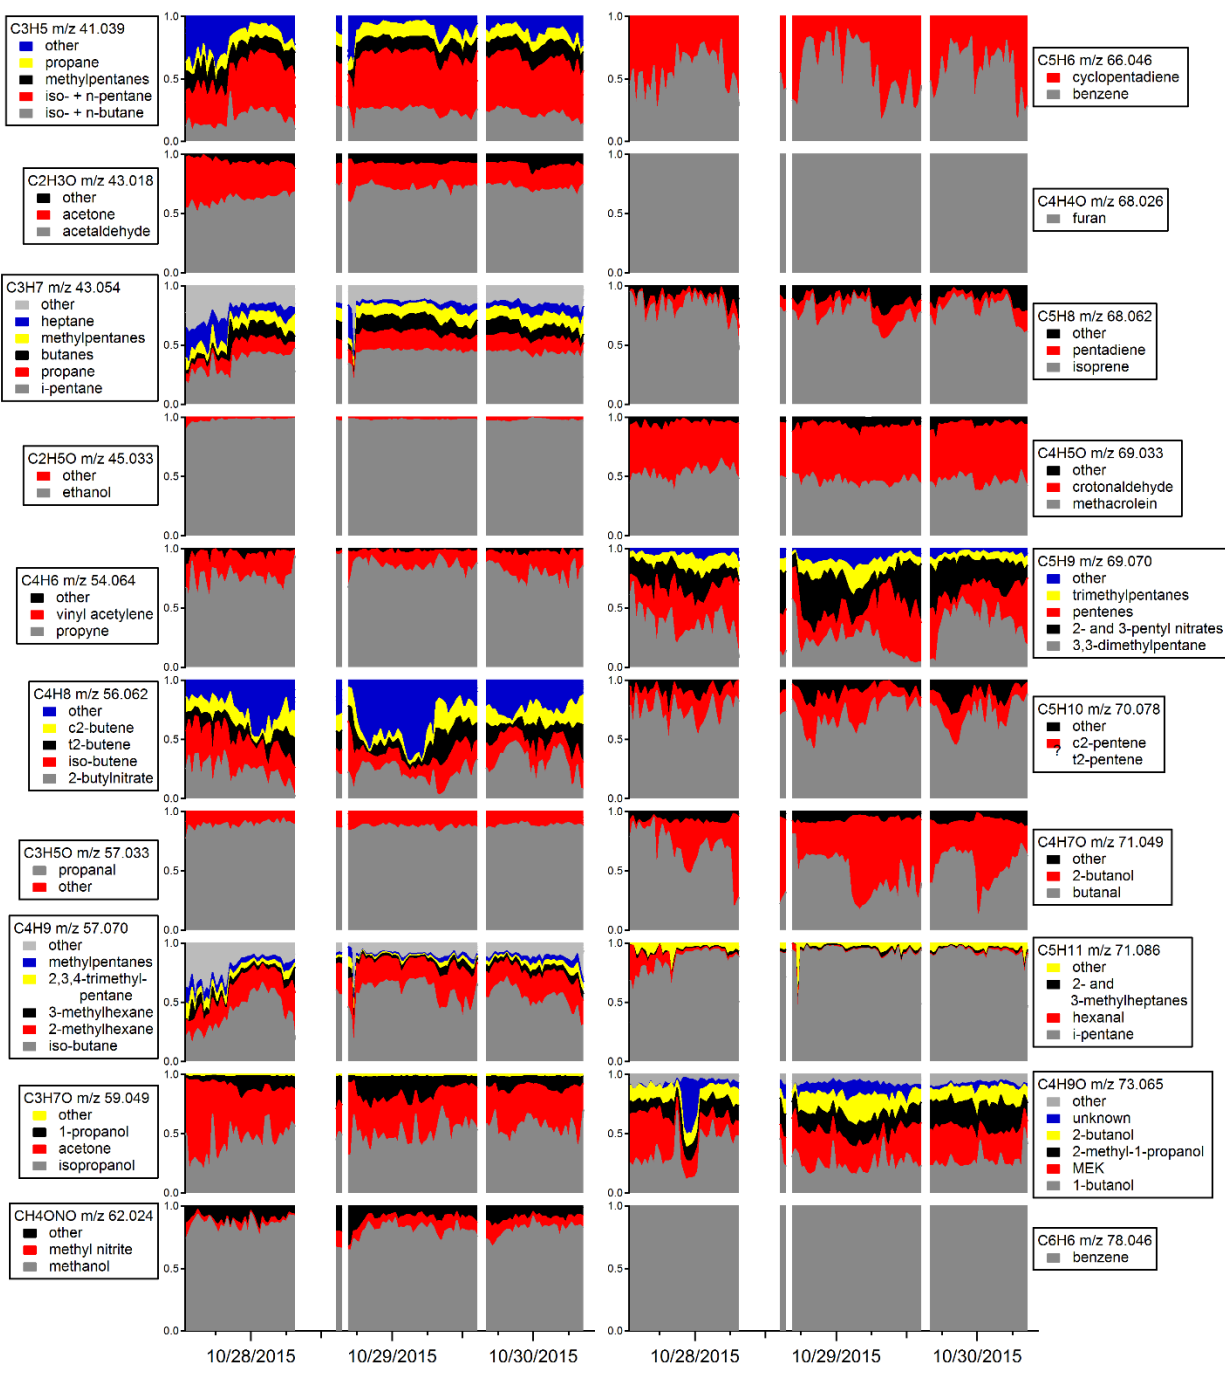

Figure S5. Speciated contributions to various  $\text{NO}^+$  CIMS masses, in urban air. Values on Y-axes are the fractional contribution of each VOC to total signal. Includes  $m/z$  41- $m/z$  78.

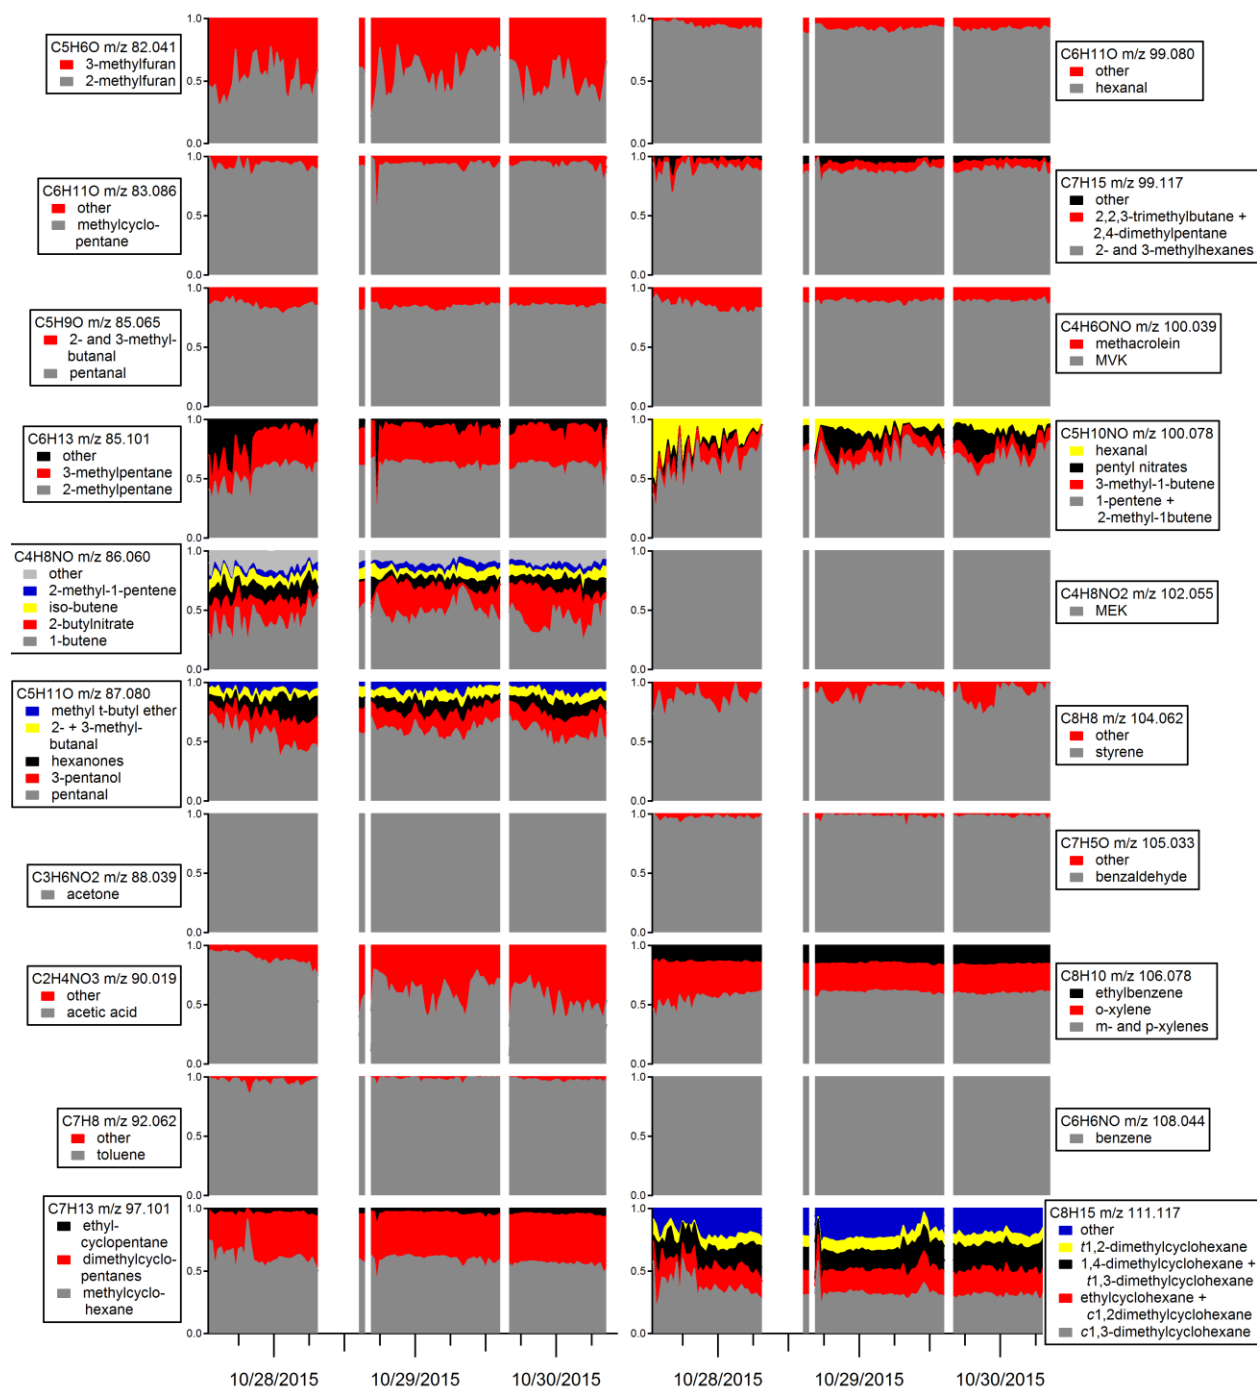

Figure S6. Figure S5, continued. Includes m/z 82-m/z 111.

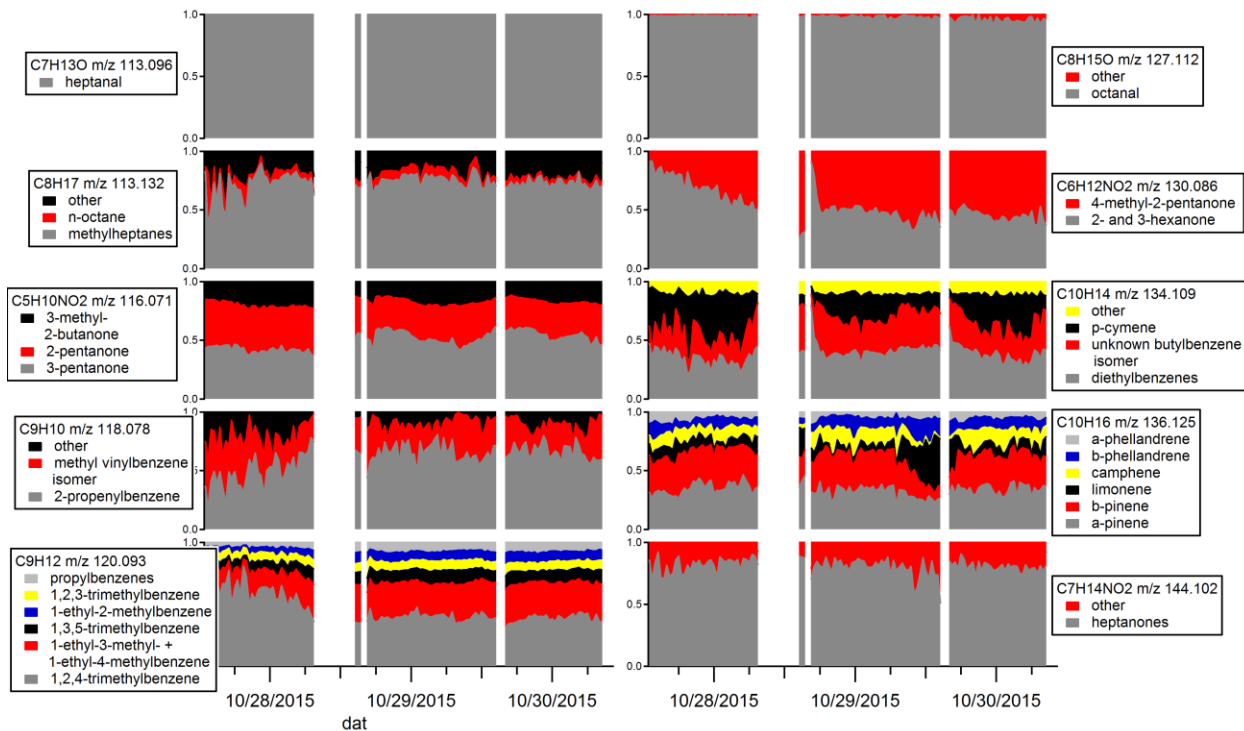

Figure S7. Figure S5, continued. Includes m/z 113-m/z 144.

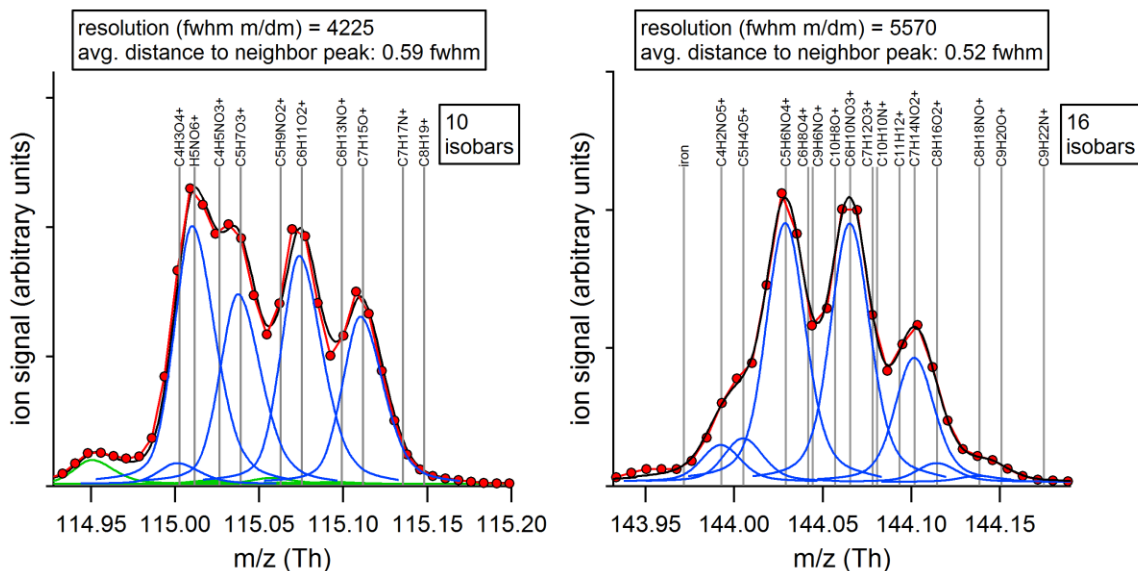

Figure S8. Example isobaric interferences for heptanone measured with  $\text{H}_3\text{O}^+$  CIMS, at  $m/z$  115  $\text{C}_7\text{H}_{14}\text{OH}^+$ , and with  $\text{NO}^+$  CIMS, at  $m/z$  144  $\text{C}_7\text{H}_{14}\text{ONO}^+$ . Although the resolution  $m/dm$  is better at  $m/z$  144, there are more possible isobaric interferences and the average distance to neighboring peaks is smaller. The  $m/z$  range of each window is 10 FWHM.  $\text{H}_3\text{O}^+$  ToF-CIMS mass spectrum courtesy of M. Coggon, collected in Boulder, CO in Dec. 2015.

Table S1. VOCs sampled in series GC-ToFCIMS laboratory experiments.

| <b>VOC name</b>              | <b>Formula</b>                  |                                                      |                                  |
|------------------------------|---------------------------------|------------------------------------------------------|----------------------------------|
| <b>alkanes</b>               |                                 | $\beta$ -pinene                                      | C <sub>10</sub> H <sub>16</sub>  |
| ethane                       | C <sub>2</sub> H <sub>6</sub>   | limonene                                             | C <sub>10</sub> H <sub>16</sub>  |
| propane                      | C <sub>3</sub> H <sub>8</sub>   | camphene                                             | C <sub>10</sub> H <sub>16</sub>  |
| n-butane                     | C <sub>4</sub> H <sub>10</sub>  | $\gamma$ -terpinene                                  | C <sub>10</sub> H <sub>16</sub>  |
| n-pentane                    | C <sub>5</sub> H <sub>12</sub>  | $\alpha$ -phellandrene                               | C <sub>10</sub> H <sub>16</sub>  |
| n-hexane                     | C <sub>6</sub> H <sub>14</sub>  | 1,8-cineol                                           | C <sub>10</sub> H <sub>16</sub>  |
| n-octane                     | C <sub>8</sub> H <sub>18</sub>  | 3-carene + myrcene                                   | C <sub>10</sub> H <sub>16</sub>  |
| n-decane                     | C <sub>10</sub> H <sub>22</sub> | <b>aromatics</b>                                     |                                  |
| n-undecane                   | C <sub>12</sub> H <sub>26</sub> | benzene                                              | C <sub>6</sub> H <sub>6</sub>    |
| i-butane (2-methylpropane)   | C <sub>4</sub> H <sub>10</sub>  | toluene                                              | C <sub>7</sub> H <sub>8</sub>    |
| i-pentane (2-methylbutane)   | C <sub>5</sub> H <sub>12</sub>  | ethylbenzene                                         | C <sub>8</sub> H <sub>10</sub>   |
| 2,2-dimethylbutane           | C <sub>6</sub> H <sub>14</sub>  | m-xylene + p-xylene                                  | C <sub>8</sub> H <sub>10</sub>   |
| 2-methylpentane              | C <sub>6</sub> H <sub>14</sub>  | o-xylene                                             | C <sub>8</sub> H <sub>10</sub>   |
| 2,3-dimethylbutane           | C <sub>6</sub> H <sub>14</sub>  | vinylbenzene (styrene)                               | C <sub>8</sub> H <sub>8</sub>    |
| 3-methylpentane              | C <sub>6</sub> H <sub>14</sub>  | isopropylbenzene                                     | C <sub>9</sub> H <sub>12</sub>   |
| 2,4-dimethylpentane          | C <sub>7</sub> H <sub>16</sub>  | n-propylbenzene                                      | C <sub>9</sub> H <sub>12</sub>   |
| 2-methylhexane               | C <sub>7</sub> H <sub>16</sub>  | 1-ethyl,3-methylbenzene +<br>1-ethyl,4-methylbenzene | C <sub>9</sub> H <sub>12</sub>   |
| 2,3-dimethylpentane          | C <sub>7</sub> H <sub>16</sub>  | 1,3,5-trimethylbenzene                               | C <sub>9</sub> H <sub>12</sub>   |
| 3,3-dimethylpentane          | C <sub>7</sub> H <sub>16</sub>  | 1-ethyl,2-methylbenzene                              | C <sub>9</sub> H <sub>12</sub>   |
| 3-methylhexane               | C <sub>7</sub> H <sub>16</sub>  | 1,2,4-trimethylbenzene                               | C <sub>9</sub> H <sub>12</sub>   |
| 2,2,4-trimethylpentane       | C <sub>8</sub> H <sub>18</sub>  | 1,2,3-trimethylbenzene                               | C <sub>9</sub> H <sub>12</sub>   |
| 2,3,4-trimethylpentane       | C <sub>8</sub> H <sub>18</sub>  | 1,3-diethylbenzene                                   | C <sub>10</sub> H <sub>14</sub>  |
| 2-methylheptane              | C <sub>8</sub> H <sub>18</sub>  | 1,4-diethylbenzene                                   | C <sub>10</sub> H <sub>14</sub>  |
| 3-methylheptane              | C <sub>8</sub> H <sub>18</sub>  | <b>aldehydes</b>                                     |                                  |
| 4-methylheptane              | C <sub>8</sub> H <sub>18</sub>  | acetaldehyde                                         | C <sub>2</sub> H <sub>4</sub> O  |
| <b>alkenes</b>               |                                 | propanal                                             | C <sub>3</sub> H <sub>6</sub> O  |
| ethene                       | C <sub>2</sub> H <sub>4</sub>   | butanal                                              | C <sub>4</sub> H <sub>8</sub> O  |
| propene                      | C <sub>3</sub> H <sub>6</sub>   | pentanal                                             | C <sub>5</sub> H <sub>10</sub> O |
| ethyne                       | C <sub>2</sub> H <sub>2</sub>   | hexanal                                              | C <sub>6</sub> H <sub>12</sub> O |
| trans-2-butene               | C <sub>4</sub> H <sub>8</sub>   | heptanal                                             | C <sub>7</sub> H <sub>14</sub> O |
| 1-butene                     | C <sub>4</sub> H <sub>8</sub>   | octanal                                              | C <sub>8</sub> H <sub>16</sub> O |
| iso-butene (2-methylpropene) | C <sub>4</sub> H <sub>8</sub>   | methacrolein                                         | C <sub>4</sub> H <sub>6</sub> O  |
| cis-2-butene                 | C <sub>4</sub> H <sub>8</sub>   | <b>ketones</b>                                       |                                  |
| 1-pentene                    | C <sub>5</sub> H <sub>10</sub>  | acetone                                              | C <sub>3</sub> H <sub>6</sub> O  |
| trans-2-pentene              | C <sub>5</sub> H <sub>10</sub>  | 2-butanone (MEK)                                     | C <sub>4</sub> H <sub>8</sub> O  |
| cis-2-pentene                | C <sub>5</sub> H <sub>10</sub>  | 3-methyl-2-butanone                                  | C <sub>5</sub> H <sub>10</sub> O |
| 1-hexene                     | C <sub>6</sub> H <sub>12</sub>  | 2-pentanone                                          | C <sub>5</sub> H <sub>10</sub> O |
| isoprene                     | C <sub>5</sub> H <sub>8</sub>   | 3-pentanone                                          | C <sub>5</sub> H <sub>10</sub> O |
| <b>cycloalkanes</b>          |                                 | 3-hexanone                                           | C <sub>6</sub> H <sub>12</sub> O |
| cyclopentane                 | C <sub>5</sub> H <sub>10</sub>  | methyl vinyl ketone (MVK)                            | C <sub>4</sub> H <sub>6</sub> O  |
| methylcyclopentane           | C <sub>6</sub> H <sub>12</sub>  | <b>other</b>                                         |                                  |
| cyclohexane                  | C <sub>6</sub> H <sub>12</sub>  | methanol                                             | CH <sub>4</sub> O                |
| methylcyclohexane            | C <sub>7</sub> H <sub>14</sub>  | ethanol                                              | C <sub>2</sub> H <sub>6</sub> O  |
| ethylcyclohexane             | C <sub>8</sub> H <sub>16</sub>  | 2-propanol                                           | C <sub>3</sub> H <sub>8</sub> O  |
| 1,1-dimethylcyclopentane     | C <sub>7</sub> H <sub>14</sub>  | methyl- <i>t</i> -butyl ether (MTBE)                 | C <sub>5</sub> H <sub>12</sub> O |
| ethylcyclopentane            | C <sub>7</sub> H <sub>14</sub>  | acetonitrile                                         | C <sub>2</sub> H <sub>3</sub> N  |
| <b>monoterpenes</b>          |                                 | 3-methylfuran                                        | C <sub>5</sub> H <sub>6</sub> O  |
| $\alpha$ -pinene             | C <sub>10</sub> H <sub>16</sub> |                                                      |                                  |
